# Supplementary material
Source: MDPI journal article supplement (https://www.mdpi.com/2311-5637/7/4/226)
Supplement: s1 [file s1 › fermentation-1389175-supplementary.pdf]

## Supplementary Data

### Green Extraction of Volatile Fatty Acids from Fermented Wastewater Using Hydrophobic Deep Eutectic Solvents

Ahmad S. Darwish<sup>a,b,1</sup>, Samah E. E. Warrag<sup>a,b,1</sup>, Tarek Lemaoui<sup>c</sup>, Maha K. Alseiari<sup>a</sup>, Farah Abu Hattab<sup>a,b</sup>, Ramis Rafay<sup>a,d</sup>,  
Inas AlNashef<sup>a,b,d</sup>, Jorge Rodríguez<sup>a,d</sup>, Nahla Alamoodi<sup>a,d,e\*</sup>.

<sup>a</sup>Chemical Engineering Department, Khalifa University, Abu Dhabi, P.O. Box 127788,  
United Arab Emirates (UAE)

<sup>b</sup>Center for Membrane and Advanced Water Technology (CMAT), Khalifa University, Abu Dhabi, P.O. Box 127788,  
United Arab Emirates (UAE)

<sup>c</sup>Laboratoire des Matériaux Polymères Multiphasiques (LMPMP), Université Ferhat ABBAS Sétif-1, 19000 Sétif,  
Algeria

<sup>d</sup>Research and Innovation Center in Carbon dioxide and Hydrogen (RICH), Khalifa University, Abu Dhabi, P.O. Box  
127788, United Arab Emirates (UAE)

<sup>e</sup>Center of Catalysis and Separation Khalifa University, Abu Dhabi, P.O. Box 127788,  
United Arab Emirates (UAE)

<sup>1</sup>Shared first authorship between Ahmad S. Darwish and Samah E. E. Warrag

**\*Corresponding Author:** Nahla Alamoodi, [nahla.alamoodi@ku.ac.ae](mailto:nahla.alamoodi@ku.ac.ae)

## 1 Numerical values of the HDES density

**Table S1.** Measured density values of the hydrophobic deep eutectic solvent, DL-menthol: lauric acid (1.5:1), at the temperature range of 298.2 K – 368.2 K. The standard deviations were calculated from duplicate measurements.<sup>a</sup>

| Temperature (K) | Freshly prepared density<br>(g·cm <sup>-3</sup> ) | Water saturated density<br>(g·cm <sup>-3</sup> ) |
|-----------------|---------------------------------------------------|--------------------------------------------------|
| 298.2           | 0.888 ±0.002                                      | 0.892 ±0.002                                     |
| 303.2           | 0.883 ±0.003                                      | 0.885 ±0.004                                     |
| 308.2           | 0.879 ±0.003                                      | 0.881 ±0.003                                     |
| 313.2           | 0.873 ±0.003                                      | 0.877 ±0.003                                     |
| 318.2           | 0.868 ±0.003                                      | 0.871 ±0.002                                     |
| 323.2           | 0.864 ±0.003                                      | 0.867 ±0.004                                     |
| 328.2           | 0.859 ±0.003                                      | 0.862 ±0.002                                     |
| 333.2           | 0.852 ±0.003                                      | 0.855 ±0.003                                     |
| 338.2           | 0.848 ±0.003                                      | 0.850 ±0.002                                     |
| 343.2           | 0.842 ±0.003                                      | 0.846 ±0.004                                     |
| 348.2           | 0.837 ±0.003                                      | 0.840 ±0.003                                     |
| 353.2           | 0.832 ±0.003                                      | 0.834 ±0.003                                     |
| 358.2           | 0.825 ±0.003                                      | 0.829 ±0.003                                     |
| 363.2           | 0.821 ±0.004                                      | 0.823 ±0.004                                     |
| 368.2           | 0.816 ±0.003                                      | 0.818 ±0.003                                     |

<sup>a</sup>Standard uncertainty in temperature and pressure  $u(T) = \pm 0.1$ ,  $u(p) = 0.04$  bar

## 2 pH Calculations

The pH is defined as the decimal logarithm of the reciprocal of the hydrogen ion activity. It can be calculated as:

$$pH = -\log_{10}^{[H^+]} \quad (1)$$

The calculations of hydrogen ion activity a solution containing acids are based on their acid's dissociation. For the case of acetic acid the dissociation equation is as follows:

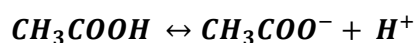

with a dissociation constant,  $K_a$  defined as:

$$K_a = \frac{[CH_3COO^-][H^+]}{[CH_3COOH]} \quad (2)$$

Finding the hydrogen ion activity  $[H^+]$  requires the solution of the equations as illustrated below:

$$let [H^+] = x$$

Then:  $[CH_3COO^-] = x$  and  $[CH_3COOH] = [CH_3COOH]_0 - x$ , eq. (2) can be rewritten as:

$$x^2 + K_a x - [CH_3COOH]_0 K_a = 0 \quad (3)$$

Given that for acetic acid the dissociation constant,  $K_a$  at a temperature of 298.2 K equals to  $1.8 \times 10^{-5}$ , and knowing the concentration of acetic acid,  $[CH_3COOH]$ , the pH can be calculated by solving eq. (3) for  $x$ .
